# Supplementary material for: Large-scale synthesis of LiMn2O4 cathode materials via a rheology-assisted solid-phase method using citric acid
Source: Royal Society of Chemistry journal article supplement (doi:10.1039/d4nj00767k), 2024-01-01
Supplement: d4nj00767k1.pdf [file d4nj00767k1.pdf]

**Supplementary Material (ESI) for NEW JOURNAL OF CHEMISTRY**

**Electronic Supporting information**

**Large-scale synthesis of  $\text{LiMn}_2\text{O}_4$  cathode materials via a  
rheology-assisted solid-phase method using citric acid**

Pengchao Liang, Yuanchao Li, Xiangzhen Xiao, Shumin Fan, Jingjing Ma, Jingjie Liu,

Yongqiang Dong, Yuhang Zong, Guangri Xu, Li Yang\*

School of Chemistry and Chemical Engineering, Henan Institute of Science and

Technology, Xinxiang 453003, P. R. China

\*Corresponding author:

E-mail address: 18738503738@163.com

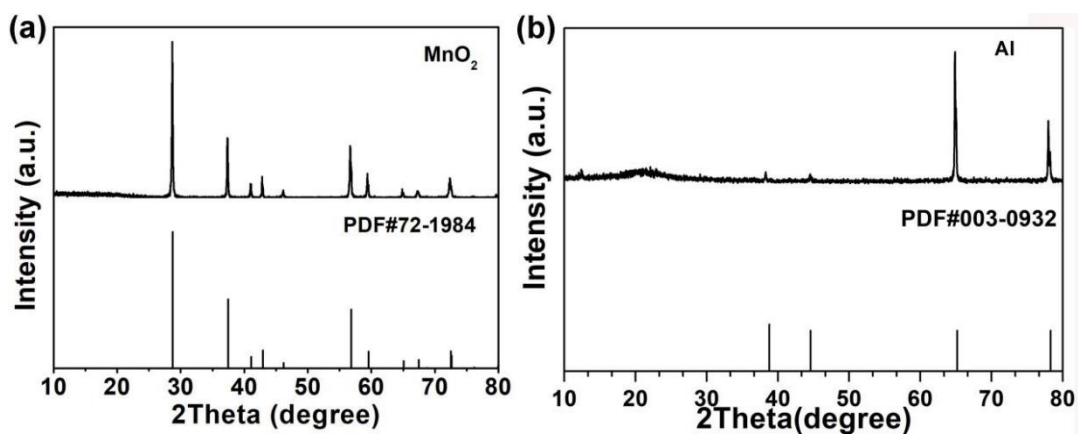

**Figure. S1** XRD patterns of (a) MnO<sub>2</sub> raw materials and aluminum foil.

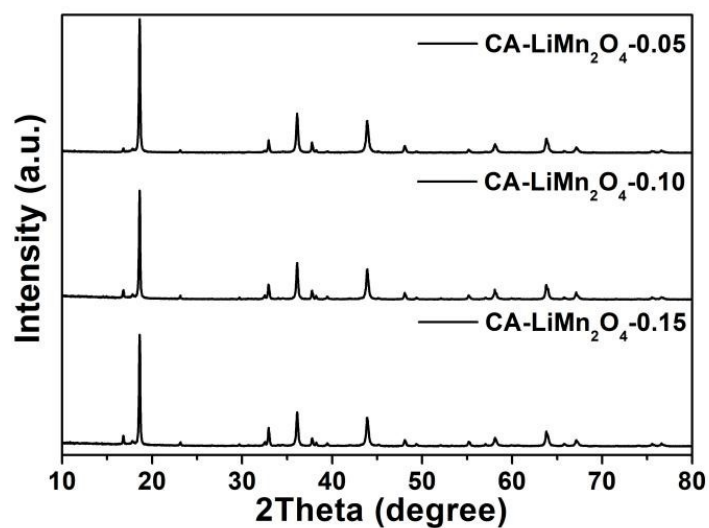

**Figure. S2** XRD patterns of CA-LiMn<sub>2</sub>O<sub>4</sub> with different amounts of citric acid.

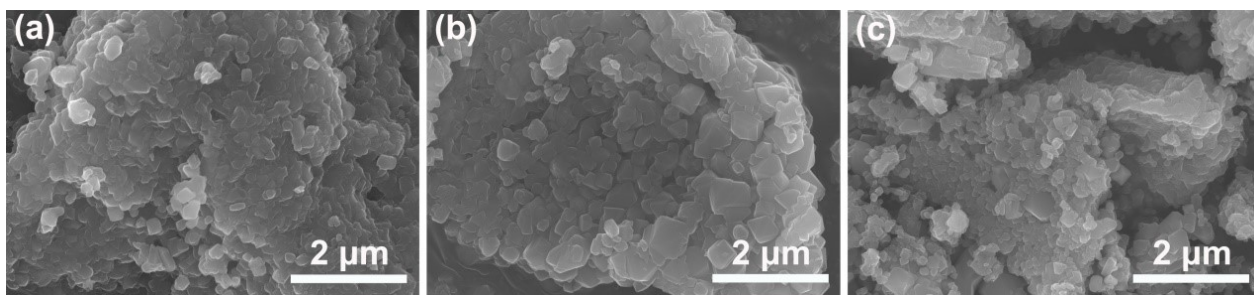

**Figure. S3** SEM images of (a) LiMn<sub>2</sub>O<sub>4</sub>, (b) CA-LiMn<sub>2</sub>O<sub>4</sub> and (c) SUC-LiMn<sub>2</sub>O<sub>4</sub>

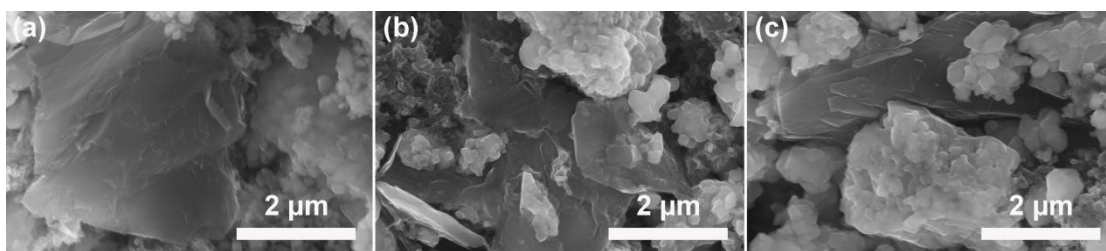

**Figure S4.** SEM images of (a)  $\text{LiMn}_2\text{O}_4$ , (b)  $\text{CA-LiMn}_2\text{O}_4$  and (c)  $\text{SUC-LiMn}_2\text{O}_4$  samples after 300 cycles.

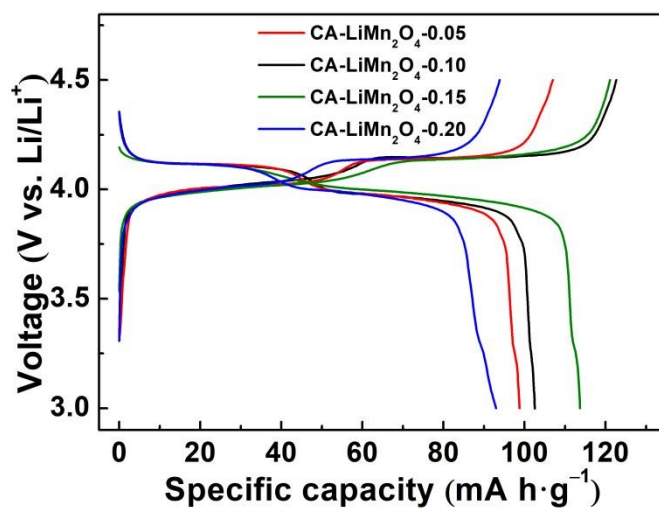

**Figure. S5** Representative capacity-voltage curves of  $\text{CA-LiMn}_2\text{O}_4$  with different amounts of citric acid.

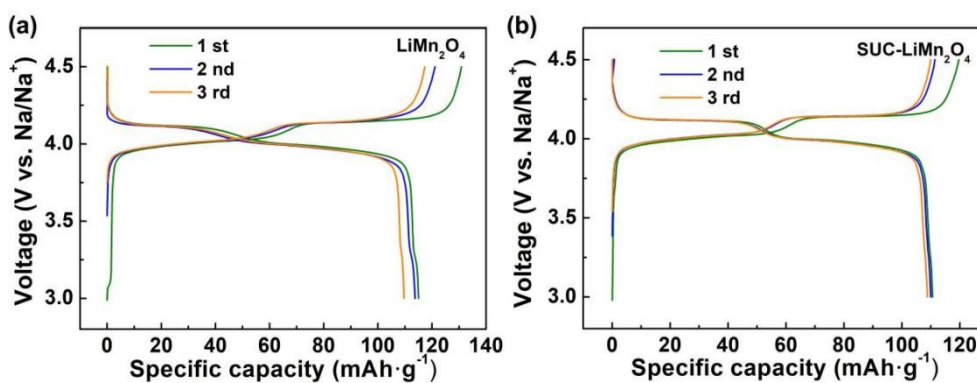

**Figure. S6** Representative capacity-voltage curves of (a)  $\text{LiMn}_2\text{O}_4$  and (b)  $\text{SUC-LiMn}_2\text{O}_4$  for initial three cycles.

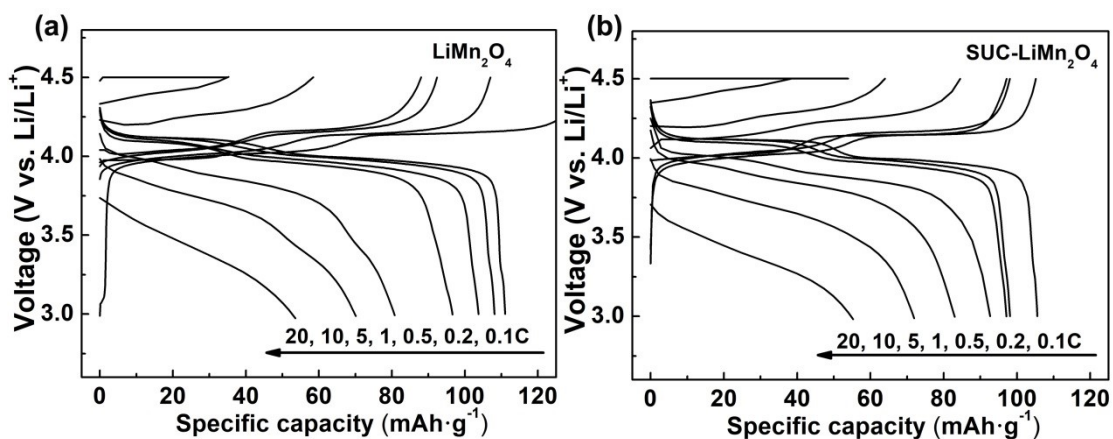

**Figure. S7** Galvanostatic charge/discharge curves of (a)  $\text{LiMn}_2\text{O}_4$  and (b) SUC- $\text{LiMn}_2\text{O}_4$  at various rates.

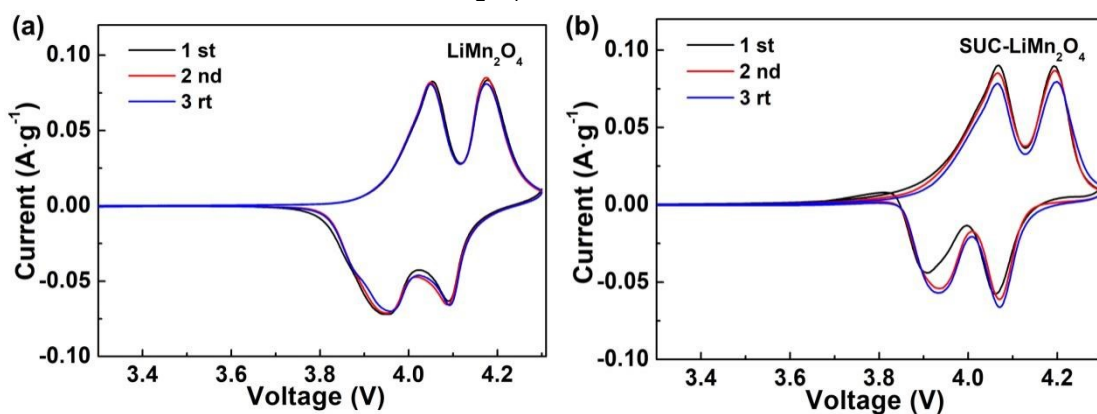

**Figure. S8** The CV curves of (a)  $\text{LiMn}_2\text{O}_4$  and (b) SUC- $\text{LiMn}_2\text{O}_4$  in initial three cycles.

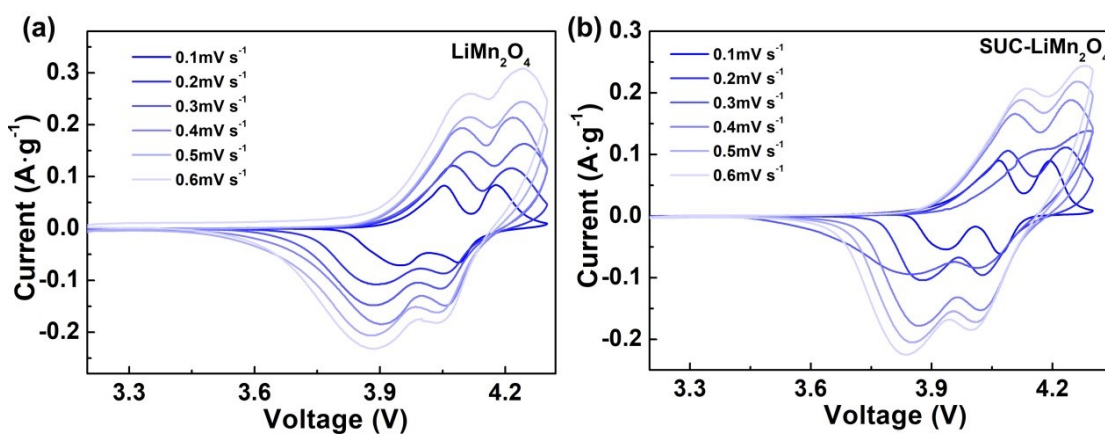

**Figure. S9** The CV curves of (a)  $\text{LiMn}_2\text{O}_4$  and (b) SUC- $\text{LiMn}_2\text{O}_4$  at the sweep rates of 0.1-0.6  $\text{mV s}^{-1}$ .

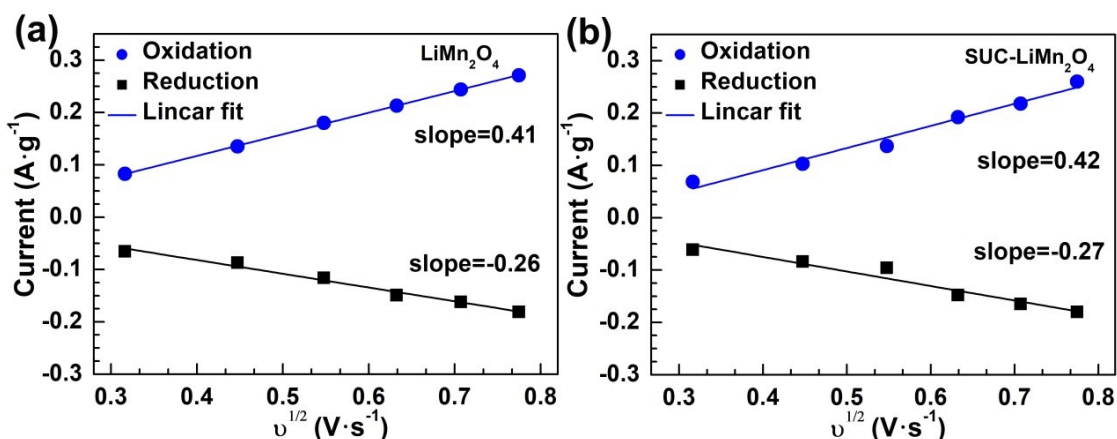

**Figure. S10** (a)  $\text{LiMn}_2\text{O}_4$  and (b)  $\text{SUC-LiMn}_2\text{O}_4$  in the linear dependence of electrode reaction current densities on square root of scan rate.

**Table S1.** Summary of electrochemical performance from  $\text{LiMn}_2\text{O}_4$  related electrodes.

| Ref.                     | Structural formula                             | Synthesis method                     | $\text{LiMn}_2\text{O}_4$ : C:PVDF | Specific capacity ( $\text{mAh g}^{-1}$ )                                          |
|--------------------------|------------------------------------------------|--------------------------------------|------------------------------------|------------------------------------------------------------------------------------|
| 1-JES 2020 <sup>1</sup>  | $\text{LiAl}_{0.16}\text{Mn}_{0.84}\text{O}_4$ | Simple combustion method             | 80:10:10                           | 117 (0.1C), 103(0.2C), 100 (0.5C), 81 (1C), 60 (2C),                               |
| 2-JAC 2021 <sup>2</sup>  | $\text{LiMn}_2\text{O}_4$                      | Hydrothermal treatment               | 80:10:10                           | 106 (0.1C), 101 (0.2C), 97 (0.5C), 93 (1C), 91 (2C), 79 (5C), 66.5 (10C),          |
| 3-JACS 2019 <sup>3</sup> | $\text{LiNi}_{0.5}\text{Mn}_{1.5}\text{O}_4$   | surface doping                       | 80:10:10                           | 111(0.2C), 106 (0.5C), 102 (1C), 97 (2C), 66 (5C),                                 |
| 4-CI-2021 <sup>4</sup>   | $\text{LiMn}_2\text{O}_4/\text{LaCoO}_3$       | molten salt method                   | 80:10:10                           | 114(0.2C), 102 (0.5C), 102 (1C), 75(2C), 42 (5C),                                  |
| 5-ASS-2019 <sup>5</sup>  | $\text{LiMn}_2\text{O}_4/\text{GO}$            | Hydrothermal treatment               | 80:10:10                           | 128(0.1C), 108 (0.25C), 91 (0.5C), 80(1C),                                         |
| This work                | CA- $\text{LiMn}_2\text{O}_4$                  | rheology-assisted solid-phase method | 80:10:10                           | 117 (0.1C), 105 (0.2C), 101 (0.5C), 95 (1C), 90 (2C), 83 (5C), 75 (10C), 63 (20C), |

## References

1. Z. Cai, Y. Ma, X. Huang, X. Yan, Z. Yu, S. Zhang, G. Song, Y. Xu, C. Wen and W. Yang, *Journal of Energy Storage*, 2020, **27**, 101036.
2. W. Xu, Y. Zheng, L. Lin, W. Lei, Z. Wang, H. Song, Y. Cheng, R. Qi, H. Peng and H. Lin, *Journal of Alloys and Compounds*, 2021, **870**, 159387.
3. W. Zhang, X. Sun, Y. Tang, H. Xia, Y. Zeng, L. Qiao, Z. Zhu, Z. Lv, Y. Zhang and X. Ge, *Journal of the American Chemical Society*, 2019, **141**, 14038-14042.
4. X. Wang, H. Wang, J. Wen, Y. Tan and Y. Zeng, *Ceramics International*, 2021, **47**, 6434-6441.
5. N. Kumar, J. R. Rodriguez, V. G. Pol and A. Sen, *Applied Surface Science*, 2019, **463**, 132-140.
